# Supplementary material
Source: PubMed Central journal article supplement (PMC3952598)
Supplement: supp_blood-2012-12-473702_blood-2012-12-473702-1.pdf [file supp_blood-2012-12-473702_blood-2012-12-473702-1.pdf]

**Supplemental Table 1.** Common genes that are both significantly differentially expressed between patients with MDM2+ and MDM2– DLBCL with WT-p53 (*P* value cutoff: .0012, false discovery rate for multiple t-tests: .30), and between patients with MDM2+ and MDM2– DLBCL with MUT-p53 (*P* value cutoff: .0023, false discovery rate: .30). The major gene function is according to the UniProt Knowledgebase (<http://www.uniprot.org>).

(1) Significantly upregulated genes in MDM2+ DLBCLs with WT-p53 or with MUT-p53.

| <b>Genes</b>                   | <b>Gene names</b>                                                        | <b>Function</b>                                                                                                                          |
|--------------------------------|--------------------------------------------------------------------------|------------------------------------------------------------------------------------------------------------------------------------------|
| <i>C11orf41/<br/>KIAA1549L</i> | KIAA1549-like; Chromosome 11 open reading frame 41                       |                                                                                                                                          |
| <i>C3orf15/<br/>MAATS1</i>     | MYCBP-associated, testis expressed; Chromosome 3 open reading frame 15   | May play a role in spermatogenesis.                                                                                                      |
| <i>CALR<br/>FOXRED2</i>        | Calreticulin<br>FAD-dependent oxidoreductase domain-containing protein 2 | Ca(2+)-binding chaperone.<br>May function in endoplasmic reticulum associated degradation through binding and subsequent ubiquitination. |
| <i>FXR2</i>                    | Fragile X mental retardation, autosomal homolog 2                        | RNA-binding.                                                                                                                             |

(2) Significantly downregulated genes in MDM2+ DLBCLs with WT-p53 or with MUT-p53.

| <b>Genes</b>   | <b>Gene names</b>                                                                                       | <b>Function</b>                                                                                |
|----------------|---------------------------------------------------------------------------------------------------------|------------------------------------------------------------------------------------------------|
| <i>MRS2</i>    | Magnesium homeostasis factor homolog (S. Cerevisiae)                                                    | Magnesium transporter into the mitochondrial matrix.                                           |
| <i>PMS2L1</i>  | Postmeiotic segregation increased 2 pseudogene1                                                         |                                                                                                |
| <i>PMS2L2</i>  | Postmeiotic segregation increased 2 pseudogene2                                                         |                                                                                                |
| <i>PMS2L5</i>  | Postmeiotic segregation increased 2 pseudogene5                                                         |                                                                                                |
| <i>TMEM216</i> | Transmembrane protein 216                                                                               | Part of the tectonic-like complex.                                                             |
| <i>YWHAB</i>   | Tyrosine 3-monooxygenase/tryptophan 5-monooxygenase activation protein, Beta /14-3-3 protein beta/alpha | Adapter protein mediating signal transduction by binding to phosphoserine-containing proteins. |

**Supplemental Table 2.** Common genes that are both significantly differentially expressed between patients with MDM2+ and MDM2– DLBCL with WT-p53 (*P* value cutoff: .0012, false discovery rate for multiple t-tests: .30), and between patients with p53+ and p53– DLBCL with WT-p53 (*P* value cutoff: .0035, false discovery rate: .30). The major gene function is according to the UniProt Knowledgebase (<http://www.uniprot.org>).

(1) Significantly upregulated genes in MDM2+ or p53+ DLBCLs with WT-p53.

| Genes          | Gene names                                                                | Function                                                                                                                                                                                            |
|----------------|---------------------------------------------------------------------------|-----------------------------------------------------------------------------------------------------------------------------------------------------------------------------------------------------|
| <i>B3GAT2</i>  | Beta-1,3-glucuronyltransferase 2 (glucuronosyltransferase S)              | Transmembrane protein involved in the biosynthesis of L2/HNK-1 carbohydrate epitope on both glycolipids and glycoproteins.                                                                          |
| <b>CACYBP</b>  | Calcyclin-binding protein                                                 | Involved in calcium-dependent ubiquitination and subsequent proteasomal degradation of target proteins.                                                                                             |
| <i>CCL22</i>   | C-C motif chemokine 22                                                    | Cys-Cys(CC) cytokines that may play a role in the trafficking of activated/effector T-lymphocytes to inflammatory sites and other aspects of activated T-lymphocyte physiology.                     |
| <b>CDKN1A</b>  | Cyclin-dependent kinase inhibitor 1 (p21, Cip1)                           | Cell cycle arrest.                                                                                                                                                                                  |
| <i>FSCN1</i>   | Fascin                                                                    | Organizes filamentous actin into bundles; play a role in cell migration, motility, adhesion and cellular interactions.                                                                              |
| <i>GDA</i>     | Guanine deaminase                                                         | Catalyzes the hydrolytic deamination of guanine producing xanthine and ammonia.                                                                                                                     |
| <i>ITPKA</i>   | Inositol-trisphosphate 3-kinase A                                         | Second messenger inositol 1,4,5-trisphosphate 3-kinase and a substrate for the cyclic AMP-dependent protein kinase, calcium/calmodulin- dependent protein kinase II, and protein kinase C in vitro. |
| <i>KDELRL2</i> | KDEL (Lys-Asp-Glu-Leu) endoplasmic reticulum protein retention receptor 2 | Required for the retention of luminal endoplasmic reticulum protein.                                                                                                                                |
| <i>KREMEN1</i> | Kringle containing transmembrane protein 1                                | Receptor for Dickkopf protein. Cooperates with Dickkopf to block Wnt/beta-catenin signaling.                                                                                                        |
| <b>MDM2</b>    | Mdm2, p53 E3 ubiquitin protein ligase homolog (mouse)                     | E3 ubiquitin-protein ligase that mediates ubiquitination of p53, leading to its degradation by the proteasome.                                                                                      |
| <b>MMP1</b>    | Matrix metalloproteinase 1 (interstitial collagenase)                     | Proteases involved in collagen degradation.                                                                                                                                                         |

|                |                                                                                             |                                                                                                                                              |
|----------------|---------------------------------------------------------------------------------------------|----------------------------------------------------------------------------------------------------------------------------------------------|
| <i>PTPRR</i>   | protein tyrosine phosphatase, receptor type, R                                              | Sequesters mitogen-activated protein kinases (MAPKs) such as MAPK1, MAPK3 and MAPK14 in the cytoplasm in an inactive form.                   |
| <i>SEC24A</i>  | SEC24 family, member A (S. Cerevisiae)                                                      | Component of coat protein II-coated ER-derived vesicles involved in protein transport from the endoplasmic reticulum to the Golgi apparatus. |
| <i>SEN3</i>    | SUMO1/sentrin/SMT3 specific peptidase 3                                                     | Protease that releases SUMO2 and SUMO3 monomers from sumoylated substrates.                                                                  |
| <i>SLC25A4</i> | Solute carrier family 25 (mitochondrial carrier; adenine nucleotide translocator), member 4 | Exchanges cytoplasmic ADP with mitochondrial ATP across the mitochondrial inner membrane.                                                    |
| <i>SLC43A2</i> | Solute carrier family 43, member 2                                                          | Sodium-, chloride-, and pH-independent high affinity transport of large neutral amino acids.                                                 |
| <i>UBE2NL</i>  | Ubiquitin-conjugating enzyme E2N-like                                                       | A member of the ubiquitin-conjugating enzyme family.                                                                                         |

Note: *CACYBP*, *CDKN1A*, *MDM2*, and *MMP1* are p53 target genes. *SEN3* attenuates MDM2-mediated p53 ubiquitination and degradation.

(2) Significantly downregulated genes in MDM2+ or p53+ DLBCLs with WT-p53.

| Genes         | Gene names                                | Function                                                                                                         |
|---------------|-------------------------------------------|------------------------------------------------------------------------------------------------------------------|
| <i>ARID5B</i> | AT rich interactive domain 5B (MRF1-like) | Forms a histone H3K9Me2 demethylase complex with PHD finger protein 2 involved in gene transcription activation. |
| <i>ATM</i>    | Ataxia telangiectasia mutated             | Serine/threonine protein kinase.                                                                                 |
| <i>CD47</i>   | CD47 molecule                             | Leukocyte surface antigen, involved in calcium influx, membrane transport, signal transduction, cell adhesion.   |
| <i>CD52</i>   | CD52 molecule                             | CAMPATH-1 antigen that may play a role in carrying and orienting carbohydrate.                                   |
| <i>CD53</i>   | CD53 molecule                             | Leukocyte surface antigen, involved in signal transduction and growth regulation in hematopoietic cells.         |
| <i>CD72</i>   | CD72 molecule                             | B-cell differentiation antigen that plays a role in B-cell proliferation and differentiation.                    |
| <i>CP</i>     | Ceruloplasmin                             | A copper-binding glycoprotein and involved in the peroxidation of Fe <sup>2+</sup> to Fe <sup>3+</sup> .         |
| <i>FCRL1</i>  | Fc receptor-like 1                        | An activating coreceptor in B-cells that                                                                         |

|                     |                                                                                  |                                                                                                                                                                                               |
|---------------------|----------------------------------------------------------------------------------|-----------------------------------------------------------------------------------------------------------------------------------------------------------------------------------------------|
| <i>FCRL2</i>        | Fc receptor-like 2                                                               | may function in B-cells activation and differentiation.<br>A member of the immunoglobulin receptor superfamily that may have an regulatory role in normal and neoplastic B-cells development. |
| <i>FCRL3</i>        | Fc receptor-like 2                                                               | A member of the immunoglobulin receptor superfamily.                                                                                                                                          |
| <i>FCRL5</i>        | Fc receptor-like 2                                                               | A member of the immunoglobulin receptor superfamily that may be involved in B-cells development and differentiation.                                                                          |
| <i>FKBP15</i>       | FK506-binding protein 133kDa                                                     | May be involved in the cytoskeletal organization of neuronal growth cones.                                                                                                                    |
| <i>GGA2</i>         | Golgi-associated, gamma adaptin ear containing, ARF binding protein 2            | Plays a role in protein sorting and trafficking between the trans-Golgi network (TGN) and endosomes.                                                                                          |
| <i>HERC4</i>        | HECT and RLD domain containing E3 ubiquitin protein ligase 4                     | Probable E3 ubiquitin-protein ligase involved in either protein trafficking or in the distribution of cellular structures.                                                                    |
| <i>HLA-DRA</i>      | Major histocompatibility complex, class II, DR alpha                             | Binds peptides derived from antigens that access the endocytic route of antigen presenting cells (APC) and presents them on the cell surface for recognition by the CD4 T-cells.              |
| <i>JMJD1C</i>       | Jumonji domain containing 1C                                                     | Probable histone demethylase that specifically demethylates 'Lys-9' of histone H3.                                                                                                            |
| <i>LENG8</i>        | Leukocyte receptor cluster (LRC) member 8                                        |                                                                                                                                                                                               |
| <i>LOC100132726</i> |                                                                                  |                                                                                                                                                                                               |
| <i>LOC730057</i>    |                                                                                  |                                                                                                                                                                                               |
| <b><i>MDM4</i></b>  | Mdm4 p53 binding protein homolog (mouse)                                         | Inhibits p53 by binding its transcriptional activation domain.                                                                                                                                |
| <i>PELI1</i>        | Pellino E3 ubiquitin protein ligase 1                                            | E3 ubiquitin ligase catalyzing the covalent attachment of ubiquitin moieties onto substrate proteins.                                                                                         |
| <b><i>RBM5</i></b>  | RNA-binding motif protein 5                                                      | Regulates alternative splicing of a number of mRNAs including TP53.                                                                                                                           |
| <i>SMCHD1</i>       | Structural maintenance of chromosomes flexible hinge domain-containing protein 1 | Required for maintenance of X inactivation in females and hypermethylation of CpG islands associated with inactive X.                                                                         |
| <i>TBC1D1</i>       | TBC1 domain family member 1                                                      | May have a role in regulating cell growth and differentiation.                                                                                                                                |
| <i>TMCC1</i>        | Transmembrane and coiled-coil domain family 1                                    |                                                                                                                                                                                               |
| <i>U2AF1</i>        | U2 small nuclear RNA auxiliary                                                   | Plays a critical role in both constitutive and                                                                                                                                                |

|               |                                       |                                                                                                                                                                                  |
|---------------|---------------------------------------|----------------------------------------------------------------------------------------------------------------------------------------------------------------------------------|
|               | factor 1                              | enhancer-dependent splicing by mediating protein-protein interactions and protein-RNA interactions required for accurate 3'-splice site selection.                               |
| <i>UBE2E1</i> | Ubiquitin-conjugating enzyme E2 E1    | E2 ubiquitin-conjugating enzyme.                                                                                                                                                 |
| <i>USP39</i>  | Ubiquitin specific peptidase 39       | Plays a role in pre-mRNA splicing as a component of the U4/U6-U5 tri-snRNP, one of the building blocks of the spliceosome.                                                       |
| <i>WTAP</i>   | Wilms tumor 1 associated protein      | Regulates G2/M cell-cycle transition by binding to the 3' UTR of CCNA2, which enhances its stability.                                                                            |
| <i>YLPM1</i>  | YLP motif-containing 1                | Plays a role in the reduction of telomerase activity during differentiation of embryonic stem cells by binding to the core promoter of TERT and controlling its down-regulation. |
| <i>ZCCHC6</i> | Zinc finger, CCHC domain containing 6 | Uridyltransferase that mediates the terminal uridylation of some specific RNAs.                                                                                                  |
| <i>ZCCHC7</i> | Zinc finger, CCHC domain containing 7 | Nucleic acid binding.                                                                                                                                                            |

---

Note: *ATM*, *MDM4*, and *RBM5* have interaction with the TP53 pathway.

**Supplemental Table 3.** Genes significantly differentially expressed between patients with MDM2+ and MDM2– DLBCL with MUT-p53 with > 2 fold change (*P* value cutoff: .0023, false discovery rate for multiple t-tests: .30). The major gene function is according to the UniProt Knowledgebase (<http://www.uniprot.org>).

(1) Genes significantly upregulated in MDM2+ patients with MUT-p53.

| <b>Genes</b>    | <b>Gene names</b>                   | <b>Biological process</b>      | <b>Function</b>                                                                                                   |
|-----------------|-------------------------------------|--------------------------------|-------------------------------------------------------------------------------------------------------------------|
| <i>ZNF827</i>   | Zinc finger protein 827             | Transcription                  | Transcriptional regulation.                                                                                       |
| <i>CXCL5</i>    | Chemokine (C-X-C motif) ligand 5    | Signaling                      | Involved in neutrophil activation.                                                                                |
| <i>FLCN</i>     | Folliculin                          | Protein phosphorylation        | May play a role in pathogenesis yet may be a tumor suppressor.                                                    |
| <i>MXD1</i>     | MAX dimerization protein 1          | Transcription                  | Transcriptional repressor protein antagonizing MYC-mediated transcriptional activation.                           |
| <i>SYMPK</i>    | Symplekin                           | Cell adhesion; mRNA processing | Component of heat-sensitive complex functioning in histone mRNA 3'-end processing and component of cell junction. |
| <i>RBM8A</i>    | RNA binding motif protein 8A        | mRNA processing                | Involved in mRNA metabolism.                                                                                      |
| <i>SLC25A37</i> | Solute carrier family 25, member 37 | Transport                      | Mitochondrial iron transporter.                                                                                   |
| <i>DCAF8</i>    | DDB1- and CUL4-associated factor 8  | Protein ubiquitination         | Maybe receptor for CUL4-DDB1 E3 ubiquitin-protein ligase complex.                                                 |

Note: *CXCL5* gene activation might be the gain-of-function of p53 mutant.

(2) Genes significantly downregulated in MDM2+ patients with MUT-p53.

| <b>Genes</b>    | <b>Gene names</b>                                  | <b>Biological process</b> | <b>Function</b>                                                                                                     |
|-----------------|----------------------------------------------------|---------------------------|---------------------------------------------------------------------------------------------------------------------|
| <i>CDC42SE2</i> | CDC42 small effector 2                             | Structure                 | Interacting with CDC42, maybe involved in inducing actin filament assembly, F-actin accumulation, and phagocytosis. |
| <i>YIPF5</i>    | Yip1 domain family, member 5                       | Transport                 | Transportation between endoplasmic reticulum and Golgi.                                                             |
| <i>EIF2A</i>    | Eukaryotic translation initiation factor 2A, 65kDa | Metabolism                | Protein synthesis.                                                                                                  |

|                 |                                                                                                     |                 |                                                                                                                                                                |
|-----------------|-----------------------------------------------------------------------------------------------------|-----------------|----------------------------------------------------------------------------------------------------------------------------------------------------------------|
| <i>ATP5C1</i>   | ATP synthase, H <sup>+</sup> transporting, mitochondrial F1 complex, gamma polypeptide 1 protein 97 | Metabolism      | Mitochondrial ATP synthase.                                                                                                                                    |
| <b>MBD4</b>     | Methyl-CpG binding domain protein 4                                                                 | DNA repair      | DNA repair.                                                                                                                                                    |
| <i>UBQLN2</i>   | Ubiquilin 2                                                                                         | Metabolism      | Increases the half-life of proteins to be degraded by the proteasome.                                                                                          |
| <b>PAK2</b>     | p21 protein (Cdc42/Rac)-activated kinase 2                                                          | Apoptosis       | Full-length PAK2 stimulates cell survival and cell growth while cleaved PAK2 promotes cellular apoptosis; caspase-activated PAK2 reduces cellular translation. |
| <i>SPCS1</i>    | Signal peptidase complex subunit 1 homolog ( <i>S. cerevisiae</i> )                                 | Metabolism      | Removes signal peptides from nascent proteins in the endoplasmic reticulum.                                                                                    |
| <i>HIST1H1C</i> | Histone cluster 1, H1c                                                                              | Structure       | The linker histone H1 condenses nucleosome chains.                                                                                                             |
| <i>INTS6</i>    | Integrator complex subunit 6                                                                        | Metabolism      | Component of the Integrator complex which is involved in the snRNA U1 and U2 transcription and in their 3'-box-dependent processing.                           |
| <i>ATAD2</i>    | ATPase family, AAA domain containing 2                                                              | Transcription   | May be a transcriptional coactivator (inducing estradiol target genes, such as CCND1, MYC and E2F1); May be required for histone hyperacetylation.             |
| <i>KIN</i>      | Antigenic determinant of recA protein homolog (mouse)                                               | DNA repair      | Involved in DNA replication and repair.                                                                                                                        |
| <i>MBNL1</i>    | Muscleblind-like splicing regulator 1                                                               | mRNA processing | Mediates pre-mRNA alternative splicing regulation.                                                                                                             |
| <i>SCP2</i>     | Sterol carrier protein 2                                                                            | Metabolism      | Transfer non-specific lipid between membranes.                                                                                                                 |
| <i>ATP5E</i>    | ATP synthase, H <sup>+</sup> transporting, mitochondrial F1 complex, epsilon subunit                | Metabolism      | Mitochondrial ATP synthase.                                                                                                                                    |
| <i>C1orf156</i> | Methyltransferase like 18                                                                           |                 | Probable histidine methyltransferase (By similarity).                                                                                                          |
| <b>ATG7</b>     | ATG7 autophagy related 7 homolog ( <i>S. cerevisiae</i> )                                           | Autophagy       | Conjugation of autophagy proteins.                                                                                                                             |

|                       |                                                                                       |            |                                                              |
|-----------------------|---------------------------------------------------------------------------------------|------------|--------------------------------------------------------------|
| <i>C10orf78</i>       | SWI5-dependent recombination repair 1                                                 | DNA repair | DNA repair.                                                  |
| <b><i>DCUN1D1</i></b> | DCN1, defective in cullin neddylation 1, domain containing 1 ( <i>S. cerevisiae</i> ) | Signaling  | Component of an E3 ubiquitin ligase complex for neddylation. |
| <i>DHX40</i>          | DEAH (Asp-Glu-Ala-His) box polypeptide 40                                             |            | Probable ATP-dependent RNA helicase (By similarity).         |
| <i>STYX</i>           | Serine/threonine/tyrosine interacting protein                                         |            | Probable pseudophosphatase.                                  |

---

Note: *MBD4*, *PAK2*, *ATG7*, and *DCUN1D1* have interaction with the TP53 pathway.

**Supplemental Figure 1.** Impact of MDM2 and p53 expression on overall and progression-free survival in a DLBCL validation set. **(A-B)** MDM2 overexpression did not correlate with poor survival in DLBCL. **(C-D)** p53 overexpression correlated with significant poor survival in DLBCL.



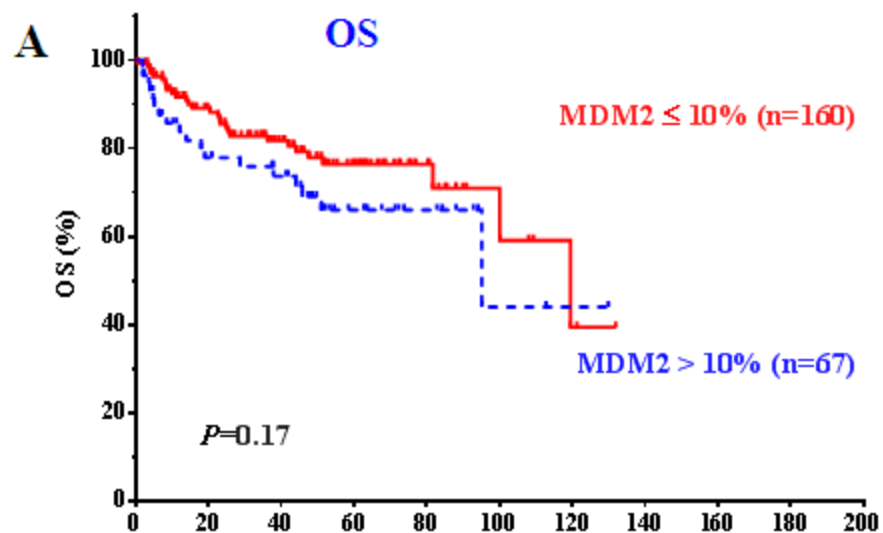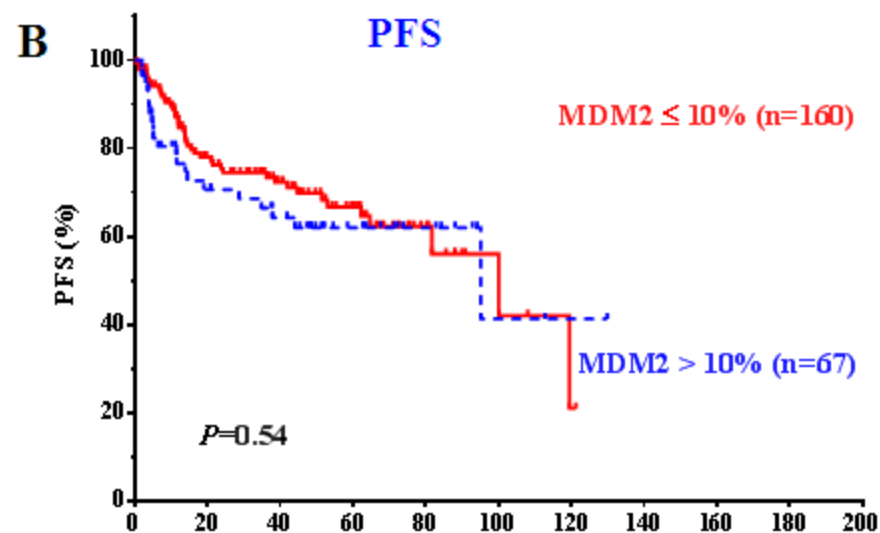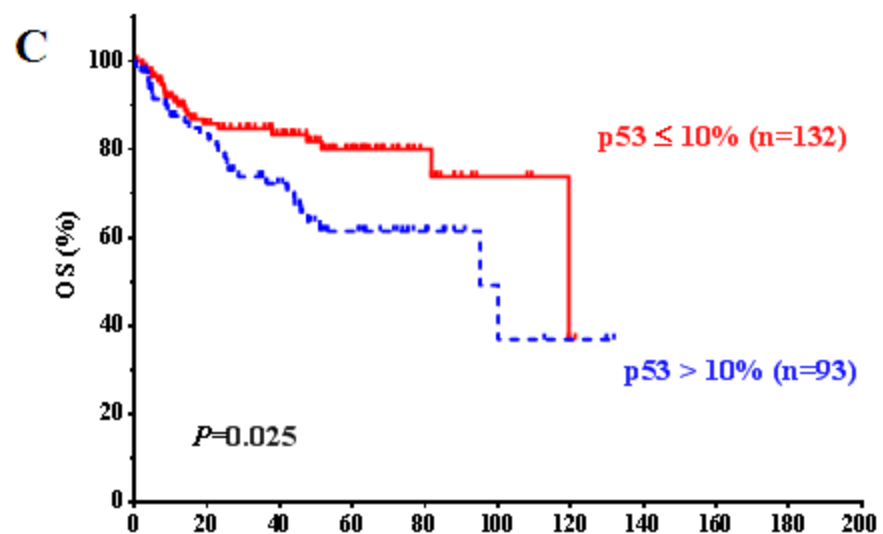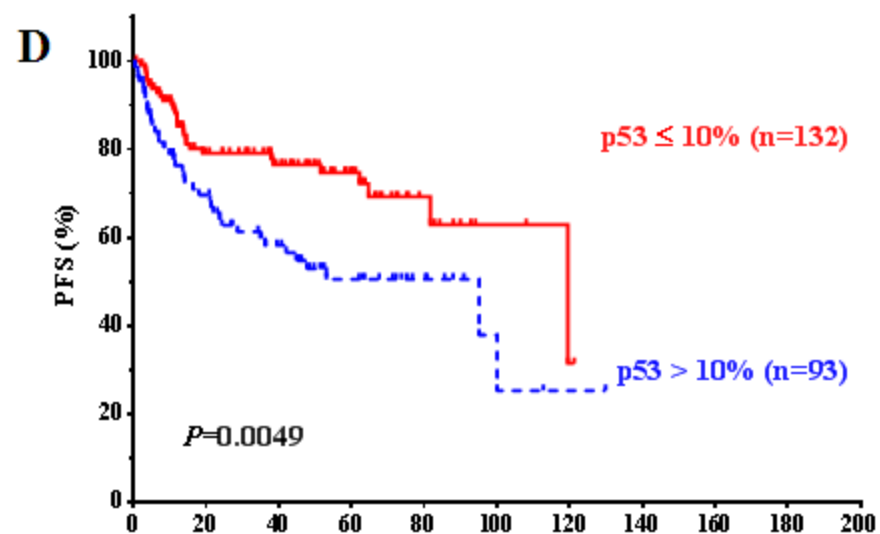

Months

Months
